# Supplementary material for: Vitamin D Deficiency in Autism Spectrum Disorder: A Cross-Sectional Study
Source: Dis Markers. 2020 Sep 18;2020:9292560. doi: 10.1155/2020/9292560 (PMC7520686; doi:10.1155/2020/9292560)
Supplement: Supplementary Materials — Demographic features and vitamin D level for each ASD and non-ASD patient. [file 9292560.f1.xlsx]

## Sheet: Foglio1
GROUP	ID	Age (years)	sex	Vitamin D (ng/mL)	Vitamin D range (D= deficiency; I= Insufficiency; N=Normality)
ASD	1	2.58	M	8	D
ASD	2	4.5	M	13	D
ASD	3	5.33	M	9	D
ASD	4	5.83	M	23	I
ASD	5	6.5	M	22	I
ASD	6	7.75	M	17	D
ASD	7	9.83	M	11	D
ASD	8	10.16	M	16	D
ASD	9	10.33	M	16	D
ASD	10	14.25	M	17	D
ASD	11	12	F	14	D
ASD	12	14	F	12	D
ASD	13	2.33	M	37	N
ASD	14	3.16	M	26	I
ASD	15	5.25	M	16	D
ASD	16	4.33	M	17	D
ASD	17	2.75	M	27	I
ASD	18	2.75	F	25	I
ASD	19	4.66	M	19	D
ASD	20	3.58	M	23	I
ASD	21	2.83	M	12	D
ASD	22	12.42	M	8	D
ASD	23	2.33	F	26	I
ASD	24	2.08	M	31	N
ASD	25	7.16	M	17	D
ASD	26	4.92	M	17	D
ASD	27	11.33	F	8	D
ASD	28	11.92	M	30	N
ASD	29	14.16	M	28	I
ASD	30	13.75	M	12	D
ASD	31	4.08	M	13	D
ASD	32	1.5	M	27	I
ASD	33	2	M	19	D
ASD	34	5	M	18	D
ASD	35	10	M	15	D
ASD	36	6.66	F	21	I
ASD	37	1.83	M	26	I
ASD	38	12.66	M	25	I
ASD	39	7.5	F	15	D
ASD	40	4.42	M	38	N
ASD	41	5.5	M	17	D
ASD	42	9.83	M	7	D
ASD	43	7	M	15	D
ASD	44	10.75	M	6	D
ASD	45	10	F	7	D
ASD	46	2.33	M	36	N
ASD	47	10.66	M	13	D
ASD	48	8.42	M	9	D
ASD	49	4.33	M	21	I
ASD	50	6.16	M	11	D
ASD	51	8	M	15	D
ASD	52	2.33	M	34	N
ASD	53	12.58	F	7	D
ASD	54	2.83	F	4	D
non ASD	55	10.66	F	19	D
non ASD	56	10.66	F	24	I
non ASD	57	11.83	F	14	D
non ASD	58	14.75	F	9	D
non ASD	59	2.83	M	12	D
non ASD	60	4.75	M	28	I
non ASD	61	17.58	M	20	I
non ASD	62	8	F	12	D
non ASD	63	9.66	M	13	D
non ASD	64	17.92	F	21	I
non ASD	65	17.33	F	13	D
non ASD	66	4.25	M	35	N
non ASD	67	10.75	M	74	N
non ASD	68		F	25	I
non ASD	69		M	22	I
non ASD	70	14.66	M	23	I
non ASD	71	11.5	M	31	N
non ASD	72	12.83	F	21	I
non ASD	73	8.92	M	11	D
non ASD	74	9.66	M	13	D
non ASD	75	14.58	F	29	I
non ASD	76	18	F	38	N
non ASD	77	14.92	M	25	I
non ASD	78	11.42	M	20	I
non ASD	79	18.08	F	50	N
non ASD	80	8	M	45	N
non ASD	81	7	M	43	N
non ASD	82	13	M	22	I
non ASD	83	15.5	F	28	I
non ASD	84	6.08	M	23	I
non ASD	85	17.5	M	30	N
non ASD	86	5.75	M	22	I
non ASD	87	9.42	F	18	D
non ASD	88	12.5	F	12	D
non ASD	89	8.83	M	31	N
non ASD	90	4.5	M	10	D
